# Supplementary material
Source: PubMed Central journal article supplement (PMC3911832)
Supplement: IAI.00929-13_zii999090445so1.pdf [file IAI.00929-13_zii999090445so1.pdf]

A.

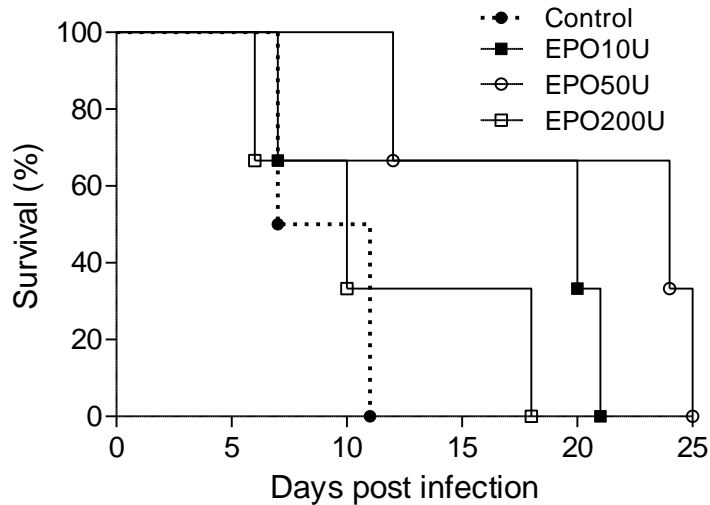

B.

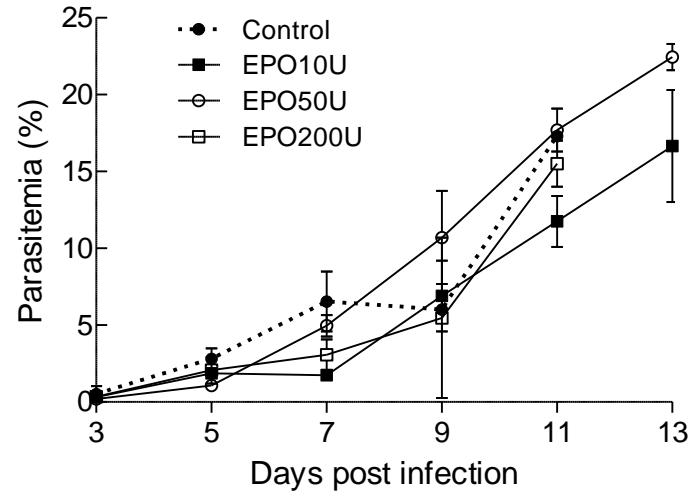

**FIG S1** Treatment with rhEPO increases survival of mice with PbA-induced ECM. C57BL/6 mice were infected with PbA and three groups ( $n = 3$  mice per group) were treated with rhEPO at day 2-4 days p.i. at three daily doses (10, 50 or 200 U/mouse), while the control group was treated with PBS. **(A)**. Cumulative survival analysis. PbA-infected mice were monitored daily for survival. All rhEPO treatments offered significant protection of mice against ECM compared with the untreated group (Kaplan-Meier analysis,  $P < 0.05$ , log-rank test) **(B)**. Parasitemia was monitored by microscopic evaluation of thin blood films with Giemsa staining. Values represent the mean  $\pm$  SEM. There were no significant differences in the levels of daily parasitemia between the treatment groups.

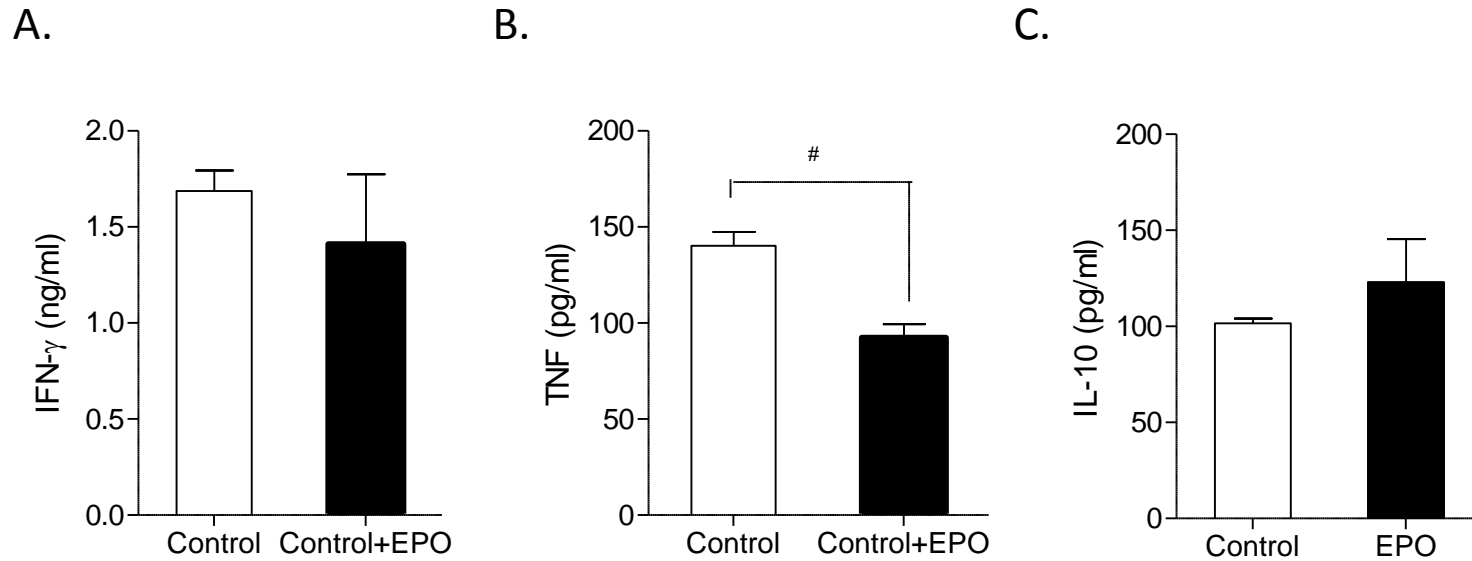

**FIG S2.** The levels of cytokine secretion by splenic cells during in vitro incubation with rhEPO. The splenocytes from PbA-infected mice 5 days p.i. were cultured in the presence (Control) or absence of 5 U/ml rhEPO for 48 h. The levels of IFN- $\gamma$  (A), TNF (B), and IL-10 (C) were quantified by ELISA. Results are mean  $\pm$  SEM of three three independent experiments. # indicates statistically significant difference ( $P < 0.05$ ).
